# Supplementary material
Source: HighWire-hosted journal article supplement (https://www.cancerbiomed.org/content/17/3/753)
Supplement: media-1 [file media-1.pdf]

## Supplementary materials

**Table S1** Clinical characteristics of 66 patients with lung adenocarcinoma

| Characteristics                                        | Cases | Group             |                     | <i>P</i> |
|--------------------------------------------------------|-------|-------------------|---------------------|----------|
|                                                        |       | Placebo, <i>n</i> | Anlotinib, <i>n</i> |          |
| Sex                                                    |       |                   |                     | 0.481    |
| Male                                                   | 38    | 14                | 24                  |          |
| Female                                                 | 28    | 8                 | 20                  |          |
| Age, years                                             |       |                   |                     | 0.116    |
| ≤ 60                                                   | 36    | 9                 | 27                  |          |
| > 60                                                   | 30    | 13                | 17                  |          |
| Smoking                                                |       |                   |                     | 0.444    |
| Yes                                                    | 28    | 7                 | 21                  |          |
| No                                                     | 38    | 15                | 23                  |          |
| TNM stage                                              |       |                   |                     | 0.466    |
| IIIB                                                   | 4     | 2                 | 2                   |          |
| IV                                                     | 62    | 20                | 42                  |          |
| No. of baseline metastatic lesions                     |       |                   |                     | 0.862    |
| ≤ 3                                                    | 35    | 12                | 23                  |          |
| > 3                                                    | 31    | 10                | 21                  |          |
| No. of patients with new metastatic lesions            |       |                   |                     | < 0.01** |
| 0                                                      | 51    | 15                | 36                  |          |
| ≥ 1                                                    | 15    | 7                 | 8                   |          |
| No. of patients with new lymph node metastatic lesions |       |                   |                     | < 0.01** |
| 0                                                      | 59    | 18                | 41                  |          |
| ≥ 1                                                    | 7     | 4                 | 3                   |          |
| ECGO performance                                       |       |                   |                     | 0.29     |
| 0                                                      | 9     | 1                 | 8                   |          |
| 1                                                      | 55    | 20                | 35                  |          |
| 2                                                      | 2     | 1                 | 1                   |          |

EGFR, epidermal growth factor receptor; ECGO, Eastern Collaborative Oncology Group; *P*-value were calculated with Spearman rank correlation test. \*\**P* < 0.05.

**Table S2** Correlation between lymphatic vessel density (lymphangiogenesis) and clinicopathologic characteristics in 144 patients with lung adenocarcinoma

| Characteristics | Cases | Lymphatic vessel density |        | <i>P</i>     |
|-----------------|-------|--------------------------|--------|--------------|
|                 |       | Mean                     | SEM    |              |
| Sex             |       |                          |        | 0.057        |
| Male            | 69    | 11.75                    | 18.896 |              |
| Female          | 75    | 8.80                     | 13.270 |              |
| Age, years      |       |                          |        | 0.514        |
| ≤ 60            | 87    | 9.20                     | 12.599 |              |
| > 60            | 57    | 11.77                    | 20.592 |              |
| Smoking         |       |                          |        | 0.855        |
| Yes             | 78    | 10.49                    | 19.164 |              |
| No              | 66    | 9.99                     | 13.359 |              |
| M stage         |       |                          |        | < 0.001***   |
| M0              | 113   | 9.51                     | 16.362 |              |
| M1              | 11    | 18.73                    | 11.917 |              |
| N stage         |       |                          |        | < 0.0001**** |
| N0              | 90    | 5.06                     | 5.481  |              |
| N1              | 12    | 9.50                     | 4.622  |              |
| N2              | 41    | 21.89                    | 25.830 |              |
| N3              | 1     | 4.00                     | /      |              |
| T stage         |       |                          |        | < 0.0001**** |
| T1              | 80    | 6.84                     | 11.611 |              |
| T2              | 42    | 15.46                    | 24.067 |              |
| T3              | 15    | 12.63                    | 7.640  |              |
| T4              | 7     | 12.14                    | 6.122  |              |
| TNM stage       |       |                          |        | < 0.0001**** |
| I               | 76    | 3.79                     | 3.914  |              |
| II              | 18    | 8.08                     | 4.784  |              |
| III             | 37    | 21.66                    | 26.720 |              |
| IV              | 13    | 18.15                    | 11.157 |              |

*P* value were calculated with Spearman rank correlation test;  
\*\*\**P* < 0.001; \*\*\*\**P* < 0.0001.

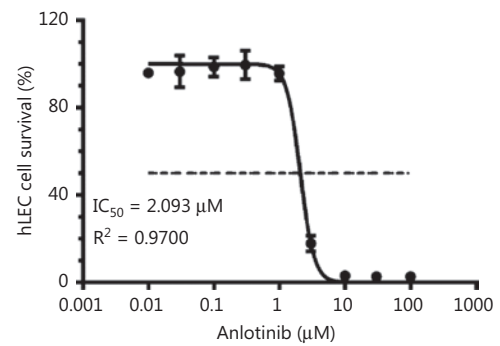

**Figure S1** Anlotinib inhibits hLEC cell proliferation.

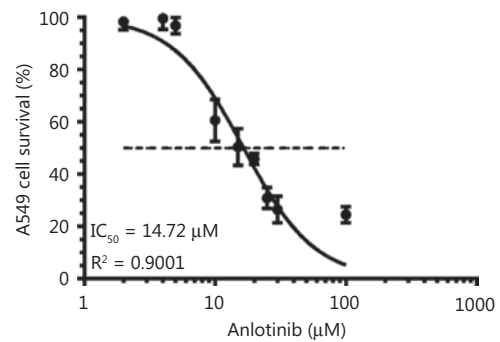

**Figure S2** Anlotinib inhibits A549<sup>EGFP</sup> proliferation.

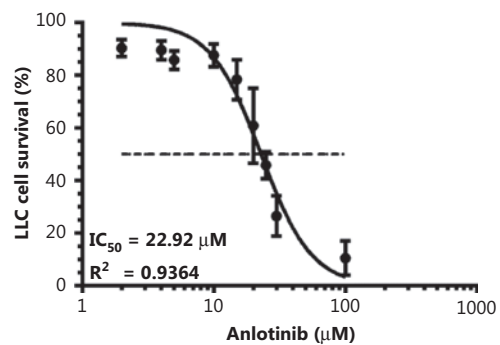

**Figure S3** Anlotinib inhibits LLC proliferation.

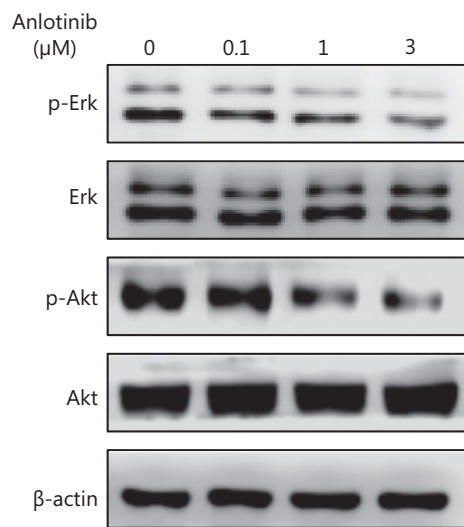

**Figure S4** Anlotinib inhibits phosphorylation of Akt and Erk in A549<sup>EGFP</sup> cells.
